# Supplementary material for: Metabolomic Derangements Are Associated with Mortality in Critically Ill Adult Patients
Source: PubMed Central journal article supplement (PMC3907548; doi:10.1371/journal.pone.0087538), 2014-01-30
Supplement: pone.0087538.s001.pdf [file pone.0087538.s001.pdf]

**Supplemental Table S1. Comprehensive Results, 187 Metabolites in RoCI**

| Metabolite                        | $\beta$ Mort <sup>1</sup> | P value Mort <sup>1</sup> | $\beta$ , adj APACHE <sup>2</sup> | P val, adj. Apache <sup>2</sup> | $\beta$ , adj APACHE, DM, IS <sup>3</sup> | Pval adj APACHE, DM, IS <sup>3</sup> | $\beta$ Mort, non-CA (N=55) <sup>4</sup> | Pval, non-CA (N=55) <sup>4</sup> |
|-----------------------------------|---------------------------|---------------------------|-----------------------------------|---------------------------------|-------------------------------------------|--------------------------------------|------------------------------------------|----------------------------------|
| 1-arachidonoyl-GPE (20:4)         | -1.51                     | 1.00E-04                  | -1.44                             | 3.00E-04                        | -1.36                                     | 8.00E-04                             | -1.71                                    | 0.003                            |
| 3-(4-hydroxyphenyl)lactate (HPLA) | 1.09                      | 3.00E-04                  | 1.02                              | 8.00E-04                        | 0.97                                      | 0.0022                               | 1.64                                     | 0.0036                           |
| gamma-glutamyltyrosine            | 2.06                      | 5.00E-04                  | 1.99                              | 9.00E-04                        | 1.96                                      | 0.0012                               | 4.22                                     | 0.0031                           |
| taurochenodeoxycholate            | 0.59                      | 7.00E-04                  | 0.56                              | 0.0014                          | 0.55                                      | 0.0031                               | 0.61                                     | 0.011                            |
| kynurenine                        | 1.54                      | 0.0012                    | 1.51                              | 0.0044                          | 1.38                                      | 0.0089                               | 4.69                                     | 0.0145                           |
| sucrose                           | 0.35                      | 0.0014                    | 0.32                              | 0.0037                          | 0.34                                      | 0.0038                               | 0.37                                     | 0.0149                           |
| taurocholate                      | 0.48                      | 0.0015                    | 0.45                              | 0.0032                          | 0.44                                      | 0.0055                               | 0.52                                     | 0.0208                           |
| gamma-glutamylphenylalanine       | 1.59                      | 0.0017                    | 1.47                              | 0.0037                          | 1.51                                      | 0.005                                | 2.72                                     | 0.0099                           |
| glycochenodeoxycholate            | 0.58                      | 0.002                     | 0.57                              | 0.0027                          | 0.57                                      | 0.0036                               | 0.77                                     | 0.0212                           |
| indolelactate                     | 0.95                      | 0.0024                    | 0.86                              | 0.0063                          | 0.8                                       | 0.0102                               | 1.05                                     | 0.023                            |
| 1-arachidonoyl-GPC (20:4)         | -0.56                     | 0.0032                    | -0.51                             | 0.0111                          | -0.48                                     | 0.0192                               | -0.53                                    | 0.0227                           |
| 1-oleoyl-GPE (18:1)               | -1.05                     | 0.0032                    | -0.99                             | 0.0058                          | -0.92                                     | 0.0104                               | -0.83                                    | 0.0718                           |
| glycocholate sulfate              | 0.63                      | 0.0033                    | 0.58                              | 0.0099                          | 0.54                                      | 0.0153                               | 0.86                                     | 0.0156                           |
| glycocholate                      | 0.53                      | 0.0036                    | 0.52                              | 0.0058                          | 0.58                                      | 0.0056                               | 0.51                                     | 0.0587                           |
| mannose                           | -1.36                     | 0.004                     | -1.73                             | 0.0023                          | -1.6                                      | 0.0053                               | -1.69                                    | 0.0381                           |
| hydroxyisovalerylcarnitine (C5)   | 0.79                      | 0.0041                    | 0.72                              | 0.0105                          | 0.7                                       | 0.0163                               | 1.33                                     | 0.0189                           |
| stearidonate (18:4n3)             | -0.88                     | 0.0043                    | -0.89                             | 0.0051                          | -0.91                                     | 0.0064                               | -1.1                                     | 0.0115                           |
| hexanoylcarnitine (C6)            | 1.15                      | 0.0053                    | 1.02                              | 0.011                           | 0.98                                      | 0.02                                 | 1.86                                     | 0.0082                           |
| isovalerylcarnitine (C5)          | 0.82                      | 0.006                     | 0.74                              | 0.0127                          | 0.7                                       | 0.0242                               | 2.14                                     | 0.0052                           |
| lactate                           | 1.11                      | 0.0071                    | 1.14                              | 0.0077                          | 1.21                                      | 0.01                                 | 1.18                                     | 0.0308                           |
| alpha-hydroxyisovalerate          | 0.72                      | 0.0071                    | 0.87                              | 0.0035                          | 0.85                                      | 0.0076                               | 0.77                                     | 0.0321                           |
| 1-methylimidazoleacetate          | 0.63                      | 0.0082                    | 0.56                              | 0.0222                          | 0.5                                       | 0.0437                               | 0.69                                     | 0.016                            |
| glycolithocholate sulfate         | 0.39                      | 0.0095                    | 0.38                              | 0.0148                          | 0.44                                      | 0.0083                               | 0.36                                     | 0.0724                           |
| isobutyrylcarnitine (C4)          | 0.71                      | 0.0095                    | 0.63                              | 0.0273                          | 0.67                                      | 0.025                                | 1.04                                     | 0.01                             |
| taurocholate sulfate              | 0.42                      | 0.0101                    | 0.37                              | 0.0227                          | 0.31                                      | 0.064                                | 0.56                                     | 0.0213                           |
| biliverdin                        | 0.72                      | 0.013                     | 0.73                              | 0.0157                          | 0.74                                      | 0.023                                | 1.11                                     | 0.0195                           |
| beta-hydroxyisovalerate           | 0.83                      | 0.0134                    | 0.8                               | 0.0165                          | 0.75                                      | 0.0296                               | 0.66                                     | 0.1713                           |
| kynurenate                        | 0.46                      | 0.0137                    | 0.4                               | 0.0656                          | 0.38                                      | 0.0783                               | 0.68                                     | 0.0244                           |
| 2-methylbutyrylcarnitine (C5)     | 0.75                      | 0.0142                    | 0.65                              | 0.0398                          | 0.56                                      | 0.0785                               | 1.39                                     | 0.0078                           |
| dihomolinolenate (20:3n3 or 3n6)  | -1.23                     | 0.0151                    | -1.14                             | 0.0307                          | -0.96                                     | 0.0744                               | -1.77                                    | 0.0201                           |
| 1-linoleoyl-GPC (18:2)            | -0.42                     | 0.0155                    | -0.36                             | 0.0485                          | -0.37                                     | 0.0553                               | -0.42                                    | 0.0728                           |
| propionylcarnitine (C3)           | 0.9                       | 0.0156                    | 0.85                              | 0.0228                          | 0.76                                      | 0.0421                               | 3                                        | 0.0036                           |
| cortisol                          | 0.62                      | 0.0175                    | 0.55                              | 0.0366                          | 0.69                                      | 0.0176                               | 1.73                                     | 0.0055                           |
| allantoin                         | 0.52                      | 0.0191                    | 0.43                              | 0.066                           | 0.42                                      | 0.0735                               | 0.76                                     | 0.0204                           |
| N2,N2-dimethylguanosine           | 0.67                      | 0.0213                    | 0.55                              | 0.0864                          | 0.54                                      | 0.094                                | 0.6                                      | 0.1178                           |
| 1-oleoyl-GPC (18:1)               | -0.43                     | 0.0216                    | -0.37                             | 0.062                           | -0.37                                     | 0.0716                               | -0.39                                    | 0.1103                           |
| tiglyl carnitine (C5)             | 0.7                       | 0.0219                    | 0.58                              | 0.069                           | 0.51                                      | 0.1137                               | 0.96                                     | 0.023                            |

|                                    |       |        |       |        |       |        |       |        |
|------------------------------------|-------|--------|-------|--------|-------|--------|-------|--------|
| xanthine                           | 0.51  | 0.022  | 0.61  | 0.0152 | 0.56  | 0.0277 | 0.69  | 0.0375 |
| N-acetylalanine                    | 1.32  | 0.0243 | 1.1   | 0.0718 | 0.98  | 0.1116 | 1.49  | 0.0609 |
| N-acetylserine                     | 0.71  | 0.0263 | 0.58  | 0.1035 | 0.57  | 0.11   | 1     | 0.0388 |
| tauroolithocholate 3-sulfate       | 0.33  | 0.027  | 0.31  | 0.0392 | 0.3   | 0.0457 | 0.39  | 0.0576 |
| methionine                         | 0.96  | 0.029  | 0.94  | 0.0332 | 0.87  | 0.0528 | 1.72  | 0.012  |
| butyrylcarnitine (C4)              | 0.81  | 0.0306 | 0.82  | 0.0309 | 0.78  | 0.0502 | 1.04  | 0.0529 |
| erythronate                        | 0.59  | 0.0306 | 0.47  | 0.1236 | 0.48  | 0.1195 | 0.66  | 0.0756 |
| glucose                            | -1.23 | 0.0315 | -1.44 | 0.0251 | -1.21 | 0.073  | 0.05  | 0.9472 |
| glucuronate                        | 0.36  | 0.0333 | 0.28  | 0.1418 | 0.28  | 0.1557 | 0.42  | 0.0754 |
| bilirubin                          | 0.38  | 0.0348 | 0.41  | 0.0266 | 0.44  | 0.026  | 0.35  | 0.1675 |
| ornithine                          | 0.51  | 0.0361 | 0.46  | 0.0545 | 0.41  | 0.0886 | 0.52  | 0.1496 |
| 2-palmitoyl-GPC (16:0)             | -0.42 | 0.0365 | -0.35 | 0.101  | -0.34 | 0.1218 | -0.4  | 0.1028 |
| 1-palmitoyl-GPC (16:0)             | -0.42 | 0.0373 | -0.34 | 0.1094 | -0.34 | 0.1251 | -0.4  | 0.104  |
| glycoursodeoxycholate              | 0.25  | 0.0381 | 0.27  | 0.0311 | 0.26  | 0.0424 | 0.24  | 0.1932 |
| urea                               | 0.63  | 0.039  | 0.49  | 0.1241 | 0.44  | 0.1626 | 1.08  | 0.0146 |
| N6-carbamoylthreonyladen osine     | 0.57  | 0.0392 | 0.43  | 0.157  | 0.45  | 0.1569 | 0.49  | 0.1557 |
| 1-palmitoleoyl-GPC (16:1)          | -0.35 | 0.0409 | -0.29 | 0.1004 | -0.32 | 0.0915 | -0.23 | 0.3239 |
| glycerate                          | 0.89  | 0.0432 | 0.77  | 0.0857 | 0.83  | 0.0765 | 2     | 0.0132 |
| erythritol                         | 0.6   | 0.0435 | 0.45  | 0.1657 | 0.46  | 0.1633 | 0.66  | 0.1146 |
| 1-stearoyl-GPC (18:0)              | -0.36 | 0.0443 | -0.3  | 0.1108 | -0.29 | 0.1395 | -0.33 | 0.1251 |
| arabitol                           | 0.49  | 0.0501 | 0.37  | 0.158  | 0.37  | 0.1676 | 0.54  | 0.1306 |
| xylonate                           | 0.35  | 0.0517 | 0.26  | 0.18   | 0.29  | 0.1466 | 0.25  | 0.3219 |
| 2-hydroxyglutarate                 | 0.58  | 0.0531 | 0.57  | 0.0662 | 0.59  | 0.0625 | 1.02  | 0.0435 |
| creatine                           | 0.44  | 0.0533 | 0.39  | 0.0998 | 0.33  | 0.1796 | 0.51  | 0.1233 |
| docosapentaenoate (n6 DPA; 22:5n6) | -0.59 | 0.0545 | -0.51 | 0.1085 | -0.41 | 0.2091 | -0.68 | 0.1015 |
| docosapentaenoate (DPA; 22:5n3)    | -0.66 | 0.0555 | -0.62 | 0.0852 | -0.59 | 0.1161 | -0.93 | 0.0591 |
| linolenate (18:3n3 or 3n6)         | -0.53 | 0.0576 | -0.57 | 0.0531 | -0.65 | 0.039  | -0.58 | 0.1559 |
| cysteine                           | 0.52  | 0.0579 | 0.45  | 0.1012 | 0.41  | 0.1422 | 1.01  | 0.0358 |
| N-acetylaspartate (NAA)            | 0.43  | 0.0607 | 0.45  | 0.0584 | 0.4   | 0.1017 | 0.65  | 0.0692 |
| hexadecanedioate (C16)             | 0.42  | 0.0699 | 0.47  | 0.0485 | 0.43  | 0.0748 | 0.44  | 0.1762 |
| N-acetylneuraminate                | 0.49  | 0.0797 | 0.33  | 0.2922 | 0.41  | 0.2049 | 0.3   | 0.3939 |
| 3-hydroxy-2-ethylpropionate        | 0.52  | 0.0812 | 0.51  | 0.0982 | 0.54  | 0.0864 | 0.47  | 0.3381 |
| pseudouridine                      | 0.61  | 0.0839 | 0.43  | 0.2559 | 0.43  | 0.2543 | 0.59  | 0.1908 |
| 4-acetamidobutanoate               | 0.46  | 0.0863 | 0.31  | 0.291  | 0.34  | 0.2578 | 0.45  | 0.2005 |
| malate                             | 0.45  | 0.0898 | 0.47  | 0.09   | 0.45  | 0.1056 | 0.8   | 0.0637 |
| gamma-glutamylvaline               | 0.66  | 0.0919 | 0.52  | 0.194  | 0.59  | 0.168  | 1.17  | 0.0573 |
| gluconate                          | 0.15  | 0.0952 | 0.09  | 0.4304 | 0.08  | 0.4627 | 0.1   | 0.4644 |
| 2-hydroxybutyrate (AHB)            | 0.5   | 0.1147 | 0.54  | 0.0936 | 0.45  | 0.1813 | 0.81  | 0.1432 |
| pipecolate                         | 0.37  | 0.1185 | 0.36  | 0.1394 | 0.36  | 0.1475 | 0.52  | 0.1637 |
| xylose                             | 0.45  | 0.12   | 0.35  | 0.2433 | 0.5   | 0.1137 | 0.63  | 0.1089 |
| bilirubin (E,E)                    | 0.42  | 0.1226 | 0.65  | 0.0347 | 0.68  | 0.0362 | 0.53  | 0.1539 |
| cystine                            | 0.33  | 0.1238 | 0.33  | 0.1228 | 0.28  | 0.2086 | 0.24  | 0.4967 |
| 1-eicosatrienoyl-GPC (20:3)        | -0.28 | 0.1253 | -0.2  | 0.3015 | -0.19 | 0.3414 | -0.27 | 0.2181 |
| 1-arachidonoyl-GPI (20:4)          | -0.54 | 0.1265 | -0.61 | 0.0949 | -0.69 | 0.0756 | -0.32 | 0.5292 |
| tryptophan                         | 0.62  | 0.1357 | 0.78  | 0.092  | 0.76  | 0.0949 | 1.57  | 0.0497 |
| pyroglutamine                      | 0.39  | 0.144  | 0.46  | 0.101  | 0.46  | 0.1161 | 0.48  | 0.2308 |

|                                                      |       |        |       |        |       |        |       |        |
|------------------------------------------------------|-------|--------|-------|--------|-------|--------|-------|--------|
| beta-sitosterol                                      | 0.28  | 0.1477 | 0.18  | 0.3805 | 0.15  | 0.4736 | 0.47  | 0.0635 |
| 3-dehydrocarnitine                                   | 0.47  | 0.1504 | 0.45  | 0.1868 | 0.5   | 0.1635 | 1.24  | 0.0337 |
| glutamate                                            | -0.35 | 0.1543 | -0.33 | 0.1821 | -0.29 | 0.2497 | -0.58 | 0.1074 |
| threitol                                             | 0.33  | 0.1641 | 0.21  | 0.3864 | 0.26  | 0.3041 | 0.37  | 0.2228 |
| arabinose                                            | 0.48  | 0.1644 | 0.33  | 0.3594 | 0.36  | 0.3385 | 0.86  | 0.0965 |
| hippurate                                            | 0.21  | 0.1703 | 0.11  | 0.5307 | 0.11  | 0.537  | 0.18  | 0.4113 |
| C-glycosyltryptophan                                 | 0.45  | 0.1812 | 0.24  | 0.5042 | 0.26  | 0.4832 | 0.34  | 0.4118 |
| octanoylcarnitine (C8)                               | 0.45  | 0.1967 | 0.41  | 0.2393 | 0.33  | 0.3665 | 0.85  | 0.0871 |
| vanillylmandelate (VMA)                              | 0.29  | 0.2028 | 0.15  | 0.5493 | 0.18  | 0.5026 | 0.4   | 0.2019 |
| phenol sulfate                                       | 0.19  | 0.2085 | 0.12  | 0.442  | 0.26  | 0.1348 | 0.22  | 0.2089 |
| acetoacetate                                         | -0.22 | 0.209  | -0.23 | 0.1915 | -0.21 | 0.2463 | -0.27 | 0.2461 |
| 3-carboxy-4-methyl-5-propyl-2-furanpropanoate (CMPF) | -0.18 | 0.2114 | -0.18 | 0.2204 | -0.15 | 0.3408 | -0.16 | 0.3602 |
| octadecanedioate (C18)                               | 0.27  | 0.2167 | 0.33  | 0.1477 | 0.29  | 0.1964 | 0.22  | 0.4818 |
| hypoxanthine                                         | 0.31  | 0.2175 | 0.33  | 0.2091 | 0.35  | 0.2097 | 0.75  | 0.0592 |
| 4-androsten-3beta,17beta-diol disulfate 2            | 0.26  | 0.219  | 0.17  | 0.4389 | 0.2   | 0.3834 | 0.46  | 0.1312 |
| mannitol                                             | 0.14  | 0.2193 | 0.07  | 0.6106 | 0.09  | 0.488  | 0.11  | 0.4169 |
| pantothenate (Vitamin B5)                            | 0.39  | 0.223  | 0.25  | 0.4573 | 0.43  | 0.2451 | 0.24  | 0.5902 |
| urate                                                | 0.56  | 0.2269 | 0.56  | 0.2119 | 0.75  | 0.1327 | 0.86  | 0.1786 |
| N-acetylthreonine                                    | 0.4   | 0.2316 | 0.23  | 0.5051 | 0.21  | 0.5447 | 0.42  | 0.343  |
| lathosterol                                          | -0.37 | 0.2333 | -0.47 | 0.1612 | -0.38 | 0.2512 | -0.39 | 0.3972 |
| serine                                               | -0.38 | 0.2376 | -0.32 | 0.332  | -0.28 | 0.4017 | -0.52 | 0.276  |
| pregnen-diol disulfate                               | 0.21  | 0.2378 | 0.13  | 0.475  | 0.12  | 0.5379 | 0.4   | 0.1275 |
| glutaroylcarnitine (C5)                              | 0.35  | 0.2424 | 0.13  | 0.7024 | 0.3   | 0.4025 | 0.73  | 0.0734 |
| deoxycarnitine                                       | 0.42  | 0.2427 | 0.4   | 0.2831 | 0.37  | 0.3261 | 0.91  | 0.0999 |
| threonine                                            | 0.37  | 0.2463 | 0.43  | 0.1949 | 0.52  | 0.1546 | 0.33  | 0.4992 |
| caffeine                                             | 0.17  | 0.256  | 0.28  | 0.0752 | 0.27  | 0.0967 | 0.26  | 0.1268 |
| pyridoxate                                           | 0.17  | 0.2602 | 0.06  | 0.7166 | 0.13  | 0.4599 | 0.2   | 0.3982 |
| heptanoate (7:0)                                     | -0.4  | 0.2605 | -0.31 | 0.3978 | -0.24 | 0.5162 | -0.78 | 0.1896 |
| fructose                                             | -0.24 | 0.283  | -0.22 | 0.3461 | -0.11 | 0.6477 | 0.11  | 0.6914 |
| glycerol                                             | -0.39 | 0.2842 | -0.54 | 0.159  | -0.57 | 0.1595 | 0.17  | 0.7381 |
| pelargonate (9:0)                                    | -0.37 | 0.2862 | -0.27 | 0.4297 | -0.24 | 0.489  | -0.56 | 0.2895 |
| hydroxyproline                                       | 0.34  | 0.2865 | 0.51  | 0.1283 | 0.52  | 0.1369 | -0.08 | 0.8782 |
| 5-dodecenoate (12:1n7)                               | 0.34  | 0.2941 | 0.5   | 0.1569 | 0.4   | 0.2842 | 0.57  | 0.1828 |
| stachydrine                                          | -0.13 | 0.2949 | -0.12 | 0.3524 | -0.1  | 0.4757 | -0.2  | 0.2141 |
| 4-vinylphenol sulfate                                | -0.16 | 0.3037 | -0.17 | 0.3122 | -0.14 | 0.4401 | -0.48 | 0.0908 |
| pregn steroid monosulfate                            | 0.18  | 0.314  | 0.16  | 0.4008 | 0.18  | 0.3595 | 0.36  | 0.2089 |
| docosahexaenoate (DHA; 22:6n3)                       | -0.34 | 0.3152 | -0.23 | 0.5278 | -0.15 | 0.6873 | -0.34 | 0.4442 |
| 2-methoxyacetaminophen sulfate                       | 0.1   | 0.3326 | 0.1   | 0.339  | 0.08  | 0.4422 | 0.08  | 0.5078 |
| phenylacetate                                        | -0.25 | 0.3385 | -0.31 | 0.2471 | -0.23 | 0.4249 | -0.13 | 0.7475 |
| iminodiacetate (IDA)                                 | -0.23 | 0.3526 | -0.29 | 0.2671 | -0.24 | 0.3576 | 0.25  | 0.5481 |
| dihomolinoleate (20:2n6)                             | -0.3  | 0.3661 | -0.26 | 0.4747 | -0.22 | 0.561  | -0.23 | 0.6219 |
| 1-stearoylglycerol (18:0)                            | 0.31  | 0.3771 | 0.28  | 0.4324 | 0.28  | 0.4611 | 0.38  | 0.4542 |
| proline                                              | 0.31  | 0.4018 | 0.33  | 0.3728 | 0.41  | 0.3004 | 0.66  | 0.4072 |
| phenylacetylglutamine                                | 0.14  | 0.4104 | 0.07  | 0.6676 | 0.18  | 0.3598 | 0.13  | 0.5923 |

|                                              |       |        |       |        |       |        |       |        |
|----------------------------------------------|-------|--------|-------|--------|-------|--------|-------|--------|
| 3-(cystein-S-yl)acetaminophen                | 0.07  | 0.4352 | 0.07  | 0.4682 | 0.04  | 0.6938 | 0.05  | 0.672  |
| 1,6-anhydroglucose                           | 0.13  | 0.4392 | 0.11  | 0.5352 | 0.11  | 0.5327 | 0.19  | 0.3801 |
| 3-methylhistidine                            | -0.13 | 0.4434 | -0.12 | 0.4763 | -0.09 | 0.6473 | -0.28 | 0.2596 |
| arginine                                     | -0.17 | 0.4487 | -0.13 | 0.5533 | -0.12 | 0.6017 | 0.02  | 0.9569 |
| epiandrosterone sulfate                      | -0.12 | 0.4535 | -0.18 | 0.2719 | -0.13 | 0.474  | -0.02 | 0.9303 |
| 5alpha-pregnan-3beta,20alpha-diol disulfate  | 0.1   | 0.4545 | 0.04  | 0.8    | 0.08  | 0.6095 | 0.21  | 0.2639 |
| 3-indoxyl sulfate                            | -0.1  | 0.4608 | -0.12 | 0.3609 | -0.07 | 0.649  | -0.07 | 0.695  |
| 5alpha-androstan-3beta,17beta-diol disulfate | 0.15  | 0.4835 | 0.06  | 0.7976 | 0.07  | 0.744  | 0.34  | 0.1917 |
| caprylate (8:0)                              | 0.24  | 0.4844 | 0.31  | 0.3619 | 0.44  | 0.2393 | 0.13  | 0.7555 |
| quinat                                       | 0.11  | 0.4903 | 0.12  | 0.4481 | 0.16  | 0.3676 | -0.01 | 0.9725 |
| choline                                      | 0.34  | 0.4956 | 0.14  | 0.791  | 0.12  | 0.8293 | 0.22  | 0.7618 |
| scyllo-inositol                              | 0.12  | 0.5034 | 0.05  | 0.7664 | 0.07  | 0.7057 | 0.03  | 0.9018 |
| N-acetylglycine                              | -0.21 | 0.5056 | -0.2  | 0.5338 | -0.2  | 0.5485 | -0.17 | 0.6907 |
| 3-methyl-2-oxovalerate                       | -0.26 | 0.5208 | 0.04  | 0.9358 | 0     | 0.9941 | -0.28 | 0.5961 |
| vaccenate (18:1n7)                           | -0.25 | 0.5246 | -0.17 | 0.6731 | -0.12 | 0.774  | -0.28 | 0.6109 |
| alpha-ketoglutarate                          | -0.18 | 0.5273 | -0.22 | 0.4524 | -0.24 | 0.4466 | 0.21  | 0.6404 |
| piperine                                     | -0.14 | 0.5358 | -0.09 | 0.6794 | -0.04 | 0.8659 | -0.08 | 0.7723 |
| palmitoleate (16:1n7)                        | -0.16 | 0.5574 | -0.07 | 0.831  | -0.13 | 0.6814 | -0.21 | 0.5684 |
| caprate (10:0)                               | 0.22  | 0.5699 | 0.35  | 0.362  | 0.43  | 0.2979 | 0.03  | 0.9388 |
| uridine                                      | -0.22 | 0.5792 | -0.04 | 0.9223 | -0.08 | 0.8486 | -0.18 | 0.7288 |
| succinylcarnitine                            | 0.19  | 0.5913 | 0.01  | 0.989  | 0.13  | 0.7482 | 0.22  | 0.6044 |
| pyruvate                                     | -0.18 | 0.6134 | -0.14 | 0.7061 | -0.03 | 0.9355 | -0.12 | 0.7956 |
| AMP                                          | -0.17 | 0.6236 | -0.14 | 0.6824 | -0.09 | 0.806  | -0.63 | 0.2368 |
| citrate                                      | 0.18  | 0.6247 | 0.35  | 0.3742 | 0.46  | 0.2803 | 0.46  | 0.4089 |
| 4-acetamidophenol                            | 0.05  | 0.6287 | 0.05  | 0.6148 | 0.02  | 0.8487 | 0.04  | 0.7772 |
| betaine                                      | 0.14  | 0.633  | 0.2   | 0.5115 | 0.2   | 0.5227 | -0.27 | 0.4941 |
| creatinine                                   | 0.19  | 0.6486 | -0.11 | 0.8116 | 0.14  | 0.7839 | 0.25  | 0.6439 |
| 4-androsten-3beta,17beta-diol disulfate 1    | 0.08  | 0.6517 | 0.01  | 0.9435 | -0.03 | 0.878  | 0.08  | 0.7341 |
| 10-heptadecenoate (17:1n7)                   | -0.13 | 0.654  | -0.02 | 0.9561 | -0.03 | 0.9188 | -0.28 | 0.4867 |
| cis-4-decenoyl carnitine                     | 0.14  | 0.6756 | 0.01  | 0.975  | -0.07 | 0.8446 | 0.7   | 0.1459 |
| alpha-ketobutyrate                           | -0.13 | 0.6764 | -0.05 | 0.8647 | -0.06 | 0.8614 | -0.12 | 0.7793 |
| 3-hydroxybutyrate (BHBA)                     | -0.07 | 0.6815 | -0.09 | 0.6026 | -0.08 | 0.6393 | -0.2  | 0.3508 |
| palmitoylcarnitine (C16)                     | -0.09 | 0.6818 | 0.01  | 0.9614 | 0.02  | 0.9187 | -0.09 | 0.7528 |
| glycerol 3-phosphate (G3P)                   | -0.14 | 0.6844 | -0.15 | 0.674  | -0.13 | 0.7187 | -0.49 | 0.3294 |
| laurylcarnitine (C12)                        | 0.09  | 0.6853 | 0.15  | 0.4998 | 0.12  | 0.6109 | 0.32  | 0.3046 |
| 2-hydroxyacetaminophen sulfate               | 0.04  | 0.748  | 0.03  | 0.8405 | 0.01  | 0.9107 | 0.04  | 0.7934 |
| 2-aminobutyrate                              | -0.1  | 0.7587 | -0.02 | 0.9507 | -0.15 | 0.6898 | 0.23  | 0.7075 |
| p-acetamidophenylglucuronide                 | -0.03 | 0.7608 | -0.04 | 0.7255 | -0.05 | 0.6412 | -0.03 | 0.8225 |
| myo-inositol                                 | 0.06  | 0.7678 | -0.02 | 0.9305 | 0     | 0.9829 | 0.01  | 0.959  |
| eicosenoate (20:1n9 or 1n11)                 | -0.09 | 0.7729 | -0.05 | 0.8911 | 0     | 0.9962 | -0.29 | 0.528  |
| margarate (17:0)                             | -0.11 | 0.774  | 0.01  | 0.972  | 0.02  | 0.9584 | -0.55 | 0.3427 |
| dehydroisoandrosterone sulfate (DHEA-S)      | -0.04 | 0.7934 | -0.1  | 0.5558 | -0.11 | 0.5543 | 0.04  | 0.8568 |
| prolylhydroxyproline                         | -0.07 | 0.7936 | -0.17 | 0.5294 | -0.14 | 0.619  | -0.04 | 0.9009 |
| androsterone sulfate                         | -0.04 | 0.8021 | -0.11 | 0.4731 | -0.09 | 0.5536 | 0.04  | 0.8502 |

|                              |       |        |       |        |       |        |       |        |
|------------------------------|-------|--------|-------|--------|-------|--------|-------|--------|
| isovalerate (C5)             | -0.1  | 0.8031 | 0.07  | 0.8686 | 0.12  | 0.7904 | 0.35  | 0.5131 |
| maltose                      | 0.06  | 0.8062 | 0.01  | 0.983  | 0.09  | 0.7467 | 0.27  | 0.5068 |
| 4-acetaminophen sulfate      | 0.02  | 0.82   | 0.01  | 0.8772 | 0.01  | 0.9249 | 0     | 0.9636 |
| catechol sulfate             | -0.03 | 0.8387 | 0.04  | 0.8191 | 0.14  | 0.4817 | -0.31 | 0.1733 |
| citrulline                   | 0.06  | 0.8406 | 0.08  | 0.8044 | 0.17  | 0.6274 | 0.16  | 0.7446 |
| myristoleate (14:1n5)        | -0.05 | 0.853  | 0.06  | 0.8325 | -0.02 | 0.943  | 0.03  | 0.9347 |
| 10-nonadecenoate (19:1n9)    | -0.05 | 0.853  | 0.03  | 0.922  | 0.04  | 0.8957 | -0.13 | 0.754  |
| heme                         | 0.03  | 0.8603 | -0.03 | 0.8885 | -0.05 | 0.815  | 0.17  | 0.519  |
| alanine                      | 0.06  | 0.865  | 0.13  | 0.7143 | 0.16  | 0.6605 | 0.12  | 0.7993 |
| 1,5-anhydroglucitol (1,5-AG) | 0.03  | 0.8769 | 0.13  | 0.5509 | 0.08  | 0.752  | -0.22 | 0.4384 |
| myristate (14:0)             | -0.07 | 0.8784 | 0.16  | 0.7456 | 0.04  | 0.9421 | -0.4  | 0.4909 |
| 4-methyl-2-oxopentanoate     | -0.05 | 0.8933 | 0.2   | 0.6011 | 0.28  | 0.4881 | 0     | 0.9955 |
| p-cresol sulfate             | 0.01  | 0.9278 | 0     | 0.9813 | 0.06  | 0.5302 | -0.08 | 0.4961 |
| threonate                    | -0.02 | 0.9486 | -0.14 | 0.6219 | -0.02 | 0.9473 | 0.08  | 0.8185 |
| deoxycholate                 | 0.01  | 0.9554 | 0.06  | 0.6885 | 0.11  | 0.4976 | 0.16  | 0.4034 |
| decanoylcarnitine (C10)      | 0.01  | 0.9699 | 0.07  | 0.8456 | 0.02  | 0.9694 | 0.28  | 0.5473 |
