# Supplementary material for: Metabolomic Derangements Are Associated with Mortality in Critically Ill Adult Patients
Source: PubMed Central journal article supplement (PMC3907548; doi:10.1371/journal.pone.0087538), 2014-01-30
Supplement: pone.0087538.s002.pdf [file pone.0087538.s002.pdf]

**Supplemental Table S2. 31 metabolites associated with mortality in both cohorts**

| Metabolite                        | Class <sup>1</sup> | RoCI $\beta^2$ | RoCI P value <sup>2</sup> | CAPSOD $\beta^3$ | CAPSOD P value <sup>3</sup> |
|-----------------------------------|--------------------|----------------|---------------------------|------------------|-----------------------------|
| 1-arachidonoyl-GPE (20:4)         | Lipid              | -1.51          | 1.00E-04                  | -0.41            | 0.0142                      |
| 3-(4-hydroxyphenyl)lactate (HPLA) | Amino acid         | 1.09           | 3.00E-04                  | 0.86             | 1.3E-05                     |
| taurochenodeoxycholate            | Lipid              | 0.59           | 7.00E-04                  | 0.22             | 0.0028                      |
| taurocholate                      | Lipid              | 0.48           | 0.0015                    | 0.21             | 0.0077                      |
| gamma-glutamylphenylalanine       | Peptide            | 1.59           | 0.0017                    | 0.61             | 0.0272                      |
| glycochenodeoxycholate            | Lipid              | 0.58           | 0.002                     | 0.19             | 0.0114                      |
| 1-arachidonoyl-GPC (20:4)         | Lipid              | -0.56          | 0.0032                    | -0.3             | 0.0016                      |
| glycocholate                      | Lipid              | 0.53           | 0.0036                    | 0.18             | 0.0259                      |
| hydroxyisovalerylcarnitine (C5)   | Amino acid         | 0.79           | 0.0041                    | 0.4              | 0.0317                      |
| hexanoylcarnitine (C6)            | Lipid              | 1.15           | 0.0053                    | 0.97             | 6.6E-05                     |
| lactate                           | Carbohydrate       | 1.11           | 0.0071                    | 0.69             | 0.0084                      |
| alpha-hydroxyisovalerate          | Amino acid         | 0.72           | 0.0071                    | 0.58             | 3.8E-04                     |
| 1-methylimidazoleacetate          | Amino acid         | 0.63           | 0.0082                    | 0.38             | 0.0104                      |
| isobutyrylcarnitine (C4)          | Amino acid         | 0.71           | 0.0095                    | 0.34             | 0.034                       |
| beta-hydroxyisovalerate           | Amino acid         | 0.83           | 0.0134                    | 0.37             | 0.0364                      |
| kynurenate                        | Amino acid         | 0.46           | 0.0137                    | 0.37             | 0.0494                      |
| 2-methylbutyrylcarnitine (C5)     | Amino acid         | 0.75           | 0.0142                    | 0.59             | 0.0024                      |
| 1-linoleoyl-GPC (18:2)            | Lipid              | -0.42          | 0.0155                    | -0.3             | 0.0162                      |
| propionylcarnitine (C3)           | Lipid              | 0.9            | 0.0156                    | 0.62             | 0.0013                      |
| cortisol                          | Lipid              | 0.62           | 0.0175                    | 0.56             | 0.0118                      |
| allantoin                         | Nucleotide         | 0.52           | 0.0191                    | 0.55             | 0.0124                      |
| N2,N2-dimethylguanosine           | Nucleotide         | 0.67           | 0.0213                    | 0.5              | 0.0071                      |
| tiglyl carnitine (C5)             | Amino acid         | 0.7            | 0.0219                    | 0.72             | 0.0054                      |
| xanthine                          | Nucleotide         | 0.51           | 0.022                     | 0.55             | 0.0204                      |
| N-acetylalanine                   | Amino acid         | 1.32           | 0.0243                    | 1.03             | 0.004                       |
| N-acetyls erine                   | Amino acid         | 0.71           | 0.0263                    | 0.65             | 0.0028                      |
| butyrylcarnitine (C4)             | Lipid              | 0.81           | 0.0306                    | 0.75             | 3.6E-04                     |
| ornithine                         | Amino acid         | 0.51           | 0.0361                    | 0.3              | 0.0232                      |
| 2-palmitoyl-GPC (16:0)            | Lipid              | -0.42          | 0.0365                    | -0.31            | 0.0482                      |
| 1-palmitoyl-GPC (16:0)            | Lipid              | -0.42          | 0.0373                    | -0.42            | 0.002                       |
| 1-stearoyl-GPC (18:0)             | Lipid              | -0.36          | 0.0443                    | -0.26            | 0.0324                      |
