# Supplementary material for: Metabolomic Derangements Are Associated with Mortality in Critically Ill Adult Patients
Source: PubMed Central journal article supplement (PMC3907548; doi:10.1371/journal.pone.0087538), 2014-01-30
Supplement: pone.0087538.s003.pdf [file pone.0087538.s003.pdf]

**Supplemental Table S3. Association with mortality in all 308 Metabolites tested in RoCI**

| <b>Metabolite</b>                 | <b>Class</b> | <b>RoCI <math>\beta^1</math></b> | <b>P value<sup>1</sup></b> | <b>Tested only in RoCI</b> |
|-----------------------------------|--------------|----------------------------------|----------------------------|----------------------------|
| 1-arachidonoyl-GPE (20:4)         | Lipid        | -1.51                            | 1.00E-04                   |                            |
| 3-(4-hydroxyphenyl)lactate (HPLA) | Amino acid   | 1.09                             | 3.00E-04                   |                            |
| gamma-glutamyltyrosine            | Peptide      | 2.06                             | 5.00E-04                   |                            |
| phenyllactate (PLA)               | Amino acid   | 1.15                             | 6.00E-04                   | Y                          |
| taurochenodeoxycholate            | Lipid        | 0.59                             | 7.00E-04                   |                            |
| kynurenine                        | Amino acid   | 1.54                             | 0.0012                     |                            |
| 3-hydroxyisobutyrate              | Amino acid   | 1.89                             | 0.0012                     | Y                          |
| sucrose                           | Carbohydrate | 0.35                             | 0.0014                     |                            |
| taurocholate                      | Lipid        | 0.48                             | 0.0015                     |                            |
| gamma-glutamylphenylalanine       | Peptide      | 1.59                             | 0.0017                     |                            |
| glycochenodeoxycholate            | Lipid        | 0.58                             | 0.002                      |                            |
| N-acetyltyrosine                  | Amino acid   | 0.85                             | 0.0021                     | Y                          |
| ribitol                           | Carbohydrate | 1.84                             | 0.0024                     | Y                          |
| indolelactate                     | Amino acid   | 0.95                             | 0.0024                     |                            |
| 1-oleoyl-GPE (18:1)               | Lipid        | -1.05                            | 0.0032                     |                            |
| 1-arachidonoyl-GPC (20:4)         | Lipid        | -0.56                            | 0.0032                     |                            |
| 1-linoleoyl-GPE (18:2)            | Lipid        | -1                               | 0.0032                     | Y                          |
| glycocholate sulfate              | Lipid        | 0.63                             | 0.0033                     |                            |
| glycocholate                      | Lipid        | 0.53                             | 0.0036                     |                            |
| mannose                           | Carbohydrate | -1.36                            | 0.004                      |                            |
| hydroxyisovalerylcarnitine (C5)   | Amino acid   | 0.79                             | 0.0041                     |                            |
| stearidonate (18:4n3)             | Lipid        | -0.88                            | 0.0043                     |                            |
| trans-urocanate                   | Amino acid   | 0.49                             | 0.0048                     | Y                          |
| hexanoylcarnitine (C6)            | Lipid        | 1.15                             | 0.0053                     |                            |
| fucose                            | Carbohydrate | 0.9                              | 0.0056                     | Y                          |
| 2-hydroxy-3-methylvalerate        | Amino acid   | 0.74                             | 0.0059                     | Y                          |
| isovalerylcarnitine (C5)          | Amino acid   | 0.82                             | 0.006                      |                            |
| N-6-trimethyllysine               | Amino acid   | 1.03                             | 0.0061                     | Y                          |
| lactate                           | Carbohydrate | 1.11                             | 0.0071                     |                            |
| alpha-hydroxyisovalerate          | Amino acid   | 0.72                             | 0.0071                     |                            |
| 3-ureidopropionate                | Amino acid   | 0.84                             | 0.0077                     | Y                          |
| cortisone                         | Lipid        | 0.94                             | 0.0079                     | Y                          |
| 7-methylguanine                   | Nucleotide   | 1.26                             | 0.0079                     | Y                          |
| 1-methylimidazoleacetate          | Amino acid   | 0.63                             | 0.0082                     |                            |
| 2-arachidonoyl-GPE (20:4)         | Lipid        | -0.9                             | 0.0091                     | Y                          |
| gamma-glutamylmethionine          | Peptide      | 0.75                             | 0.0095                     | Y                          |
| glycolithocholate sulfate         | Lipid        | 0.39                             | 0.0095                     |                            |
| isobutyrylcarnitine (C4)          | Amino acid   | 0.71                             | 0.0095                     |                            |
| taurocholate sulfate              | Lipid        | 0.42                             | 0.0101                     |                            |
| 13-HODE + 9-HODE                  | Lipid        | -0.71                            | 0.0124                     | Y                          |

|                                  |                        |       |        |   |
|----------------------------------|------------------------|-------|--------|---|
| biliverdin                       | Cofactors and vitamins | 0.72  | 0.013  |   |
| beta-hydroxyisovalerate          | Amino acid             | 0.83  | 0.0134 |   |
| 1-docosaehaenoyl-GPC (22:6)      | Lipid                  | -0.48 | 0.0134 | Y |
| kynurenate                       | Amino acid             | 0.46  | 0.0137 |   |
| 2-methylbutyroylcarnitine (C5)   | Amino acid             | 0.75  | 0.0142 |   |
| 1-palmitoyl-GPE (16:0)           | Lipid                  | -0.91 | 0.0142 | Y |
| dihomolinolenate (20:3n3 or 3n6) | Lipid                  | -1.23 | 0.0151 |   |
| 1-linoleoyl-GPC (18:2)           | Lipid                  | -0.42 | 0.0155 |   |
| propionylcarnitine (C3)          | Lipid                  | 0.9   | 0.0156 |   |
| ibuprofen                        | Xenobiotics            | 0.45  | 0.0157 | Y |
| pregnenolone sulfate             | Lipid                  | 0.51  | 0.0172 | Y |
| cortisol                         | Lipid                  | 0.62  | 0.0175 |   |
| indoleacetate                    | Amino acid             | 0.82  | 0.0178 | Y |
| allantoin                        | Nucleotide             | 0.52  | 0.0191 |   |
| N-acetylphenylalanine            | Amino acid             | 0.7   | 0.0196 | Y |
| N2,N2-dimethylguanosine          | Nucleotide             | 0.67  | 0.0213 |   |
| 1-oleoyl-GPC (18:1)              | Lipid                  | -0.43 | 0.0216 |   |
| glucarate (saccharate)           | Cofactors and vitamins | 0.25  | 0.0216 | Y |
| tiglyl carnitine (C5)            | Amino acid             | 0.7   | 0.0219 |   |
| xanthine                         | Nucleotide             | 0.51  | 0.022  |   |
| N-acetylalanine                  | Amino acid             | 1.32  | 0.0243 |   |
| tauroursodeoxycholate            | Lipid                  | 0.56  | 0.025  | Y |
| N-acetylserine                   | Amino acid             | 0.71  | 0.0263 |   |
| taurolithocholate 3-sulfate      | Lipid                  | 0.33  | 0.027  |   |
| 1-stearoyl-GPE (18:0)            | Lipid                  | -0.67 | 0.0275 | Y |
| gamma-tocopherol                 | Cofactors and vitamins | -0.5  | 0.0287 | Y |
| methionine                       | Amino acid             | 0.96  | 0.029  |   |
| 2-myristoyl-GPC (14:0)           | Lipid                  | -0.4  | 0.0292 | Y |
| estrone 3-sulfate                | Lipid                  | 0.4   | 0.0301 | Y |
| erythronate                      | Carbohydrate           | 0.59  | 0.0306 |   |
| butyrylcarnitine (C4)            | Lipid                  | 0.81  | 0.0306 |   |
| 5-methylthioadenosine (MTA)      | Amino acid             | 0.74  | 0.0307 | Y |
| glucose                          | Carbohydrate           | -1.23 | 0.0315 |   |
| sphingomyelin                    | Lipid                  | -0.75 | 0.0331 | Y |
| glucuronate                      | Carbohydrate           | 0.36  | 0.0333 |   |
| 1-docosapentaenoyl-GPC (22:5n3)  | Lipid                  | -0.63 | 0.0337 | Y |
| bilirubin                        | Cofactors and vitamins | 0.38  | 0.0348 |   |
| ofloxacin                        | Xenobiotics            | 0.13  | 0.0352 | Y |
| ornithine                        | Amino acid             | 0.51  | 0.0361 |   |
| 2-palmitoyl-GPC (16:0)           | Lipid                  | -0.42 | 0.0365 |   |

|                                    |                        |       |        |   |
|------------------------------------|------------------------|-------|--------|---|
| 1-palmitoyl-GPC (16:0)             | Lipid                  | -0.42 | 0.0373 |   |
| 1-palmitoyl-GPI (16:0)             | Lipid                  | 0.65  | 0.0378 | Y |
| glycoursodeoxycholate              | Lipid                  | 0.25  | 0.0381 |   |
| urea                               | Amino acid             | 0.63  | 0.039  |   |
| N6-carbamoylthreonyladenosine      | Nucleotide             | 0.57  | 0.0392 |   |
| 1-palmitoleoyl-GPC (16:1)          | Lipid                  | -0.35 | 0.0409 |   |
| glycerate                          | Carbohydrate           | 0.89  | 0.0432 |   |
| erythritol                         | Xenobiotics            | 0.6   | 0.0435 |   |
| 1-stearoyl-GPC (18:0)              | Lipid                  | -0.36 | 0.0443 |   |
| 1,2-propanediol                    | Lipid                  | 0.21  | 0.0474 | Y |
| 1-oleoylglycerol (18:1)            | Lipid                  | -0.42 | 0.0475 | Y |
| fumarate                           | Energy                 | 0.91  | 0.0488 | Y |
| 1-palmitoylplasmenylethanolamine   | Lipid                  | -0.58 | 0.0498 | Y |
| arabitol                           | Carbohydrate           | 0.49  | 0.0501 |   |
| xylonate                           | Carbohydrate           | 0.35  | 0.0517 |   |
| theobromine                        | Xenobiotics            | 0.35  | 0.0528 | Y |
| 2-hydroxyglutarate                 | Lipid                  | 0.58  | 0.0531 |   |
| creatine                           | Amino acid             | 0.44  | 0.0533 |   |
| sarcosine (N-Methylglycine)        | Amino acid             | 0.45  | 0.0543 | Y |
| docosapentaenoate (n6 DPA; 22:5n6) | Lipid                  | -0.59 | 0.0545 |   |
| ascorbate (Vitamin C)              | Cofactors and vitamins | -0.36 | 0.0554 | Y |
| docosapentaenoate (DPA; 22:5n3)    | Lipid                  | -0.66 | 0.0555 |   |
| linolenate (18:3n3 or 3n6)         | Lipid                  | -0.53 | 0.0576 |   |
| cysteine                           | Amino acid             | 0.52  | 0.0579 |   |
| N-acetylaspartate (NAA)            | Amino acid             | 0.43  | 0.0607 |   |
| serotonin (5HT)                    | Amino acid             | -0.58 | 0.0608 | Y |
| maltotriose                        | Carbohydrate           | -0.58 | 0.0611 | Y |
| gamma-glutamylisoleucine           | Peptide                | 0.78  | 0.062  | Y |
| 2-hydroxyisobutyrate               | Amino acid             | 0.4   | 0.0644 | Y |
| hexadecanedioate (C16)             | Lipid                  | 0.42  | 0.0699 |   |
| xylitol                            | Carbohydrate           | 0.43  | 0.0748 | Y |
| N-acetylneuraminate                | Carbohydrate           | 0.49  | 0.0797 |   |
| 3-hydroxy-2-ethylpropionate        | Amino acid             | 0.52  | 0.0812 |   |
| pseudouridine                      | Nucleotide             | 0.61  | 0.0839 |   |
| 2-linoleoyl-GPE (18:2)             | Lipid                  | -0.69 | 0.084  | Y |
| 4-acetamidobutanoate               | Amino acid             | 0.46  | 0.0863 |   |
| arabonate                          | Cofactors and vitamins | 0.41  | 0.0878 | Y |
| malate                             | Energy                 | 0.45  | 0.0898 |   |
| gamma-glutamylvaline               | Peptide                | 0.66  | 0.0919 |   |
| gluconate                          | Carbohydrate           | 0.15  | 0.0952 |   |
| tetradecanedioate (C14)            | Lipid                  | 0.4   | 0.0958 | Y |

|                                               |                        |       |        |   |
|-----------------------------------------------|------------------------|-------|--------|---|
| tartarate                                     | Xenobiotics            | 0.26  | 0.0977 | Y |
| cortodoxone                                   | Lipid                  | 0.41  | 0.1047 | Y |
| N4-acetylcytidine                             | Nucleotide             | 0.65  | 0.11   | Y |
| 2-hydroxybutyrate (AHB)                       | Amino acid             | 0.5   | 0.1147 |   |
| 3-hydroxyoctanoate                            | Lipid                  | 0.57  | 0.1156 | Y |
| 4-hydroxyphenylpyruvate                       | Amino acid             | 0.5   | 0.1176 | Y |
| pipecolate                                    | Amino acid             | 0.37  | 0.1185 |   |
| xylose                                        | Carbohydrate           | 0.45  | 0.12   |   |
| bilirubin (E,E)                               | Cofactors and vitamins | 0.42  | 0.1226 |   |
| cystine                                       | Amino acid             | 0.33  | 0.1238 |   |
| 1-eicosatrienoyl-GPC (20:3)                   | Lipid                  | -0.28 | 0.1253 |   |
| 1-arachidonoyl-GPI (20:4)                     | Lipid                  | -0.54 | 0.1265 |   |
| 21-hydroxypregnenolone disulfate              | Lipid                  | 0.3   | 0.1279 | Y |
| N-acetyl-beta-alanine                         | Amino acid             | 0.61  | 0.1288 | Y |
| 5alpha-pregnan-3alpha,20beta-diol disulfate 1 | Lipid                  | 0.21  | 0.1295 | Y |
| salicyluric glucuronide                       | Xenobiotics            | -0.21 | 0.1313 | Y |
| tryptophan                                    | Amino acid             | 0.62  | 0.1357 |   |
| alpha-hydroxyisocaproate                      | Amino acid             | 0.37  | 0.1409 | Y |
| pyroglutamine                                 | Amino acid             | 0.39  | 0.144  |   |
| erythrose                                     | Carbohydrate           | -0.32 | 0.1448 | Y |
| beta-sitosterol                               | Lipid                  | 0.28  | 0.1477 |   |
| 3-dehydrocarnitine                            | Lipid                  | 0.47  | 0.1504 |   |
| 3-aminoisobutyrate                            | Nucleotide             | 0.26  | 0.1538 | Y |
| glutamate                                     | Amino acid             | -0.35 | 0.1543 |   |
| 1-heptadecanoyl-GPC (17:0)                    | Lipid                  | -0.28 | 0.1601 | Y |
| N-methyl proline                              | Amino acid             | -0.31 | 0.1617 | Y |
| 2-stearoyl-GPC (18:0)                         | Lipid                  | -0.26 | 0.1634 | Y |
| threitol                                      | Carbohydrate           | 0.33  | 0.1641 |   |
| arabinose                                     | Carbohydrate           | 0.48  | 0.1644 |   |
| hippurate                                     | Xenobiotics            | 0.21  | 0.1703 |   |
| valerate (5:0)                                | Lipid                  | -0.45 | 0.1753 | Y |
| 1-eicosadienoyl-GPC (20:2)                    | Lipid                  | -0.29 | 0.181  | Y |
| C-glycosyltryptophan                          | Amino acid             | 0.45  | 0.1812 |   |
| N1-Methyl-2-pyridone-5-carboxamide            | Cofactors and vitamins | 0.29  | 0.1857 | Y |
| campesterol                                   | Lipid                  | 0.48  | 0.1901 | Y |
| octanoylcarnitine (C8)                        | Lipid                  | 0.45  | 0.1967 |   |
| 2-linoleoyl-GPC (18:2)                        | Lipid                  | -0.32 | 0.1989 | Y |
| vanillylmandelate (VMA)                       | Amino acid             | 0.29  | 0.2028 |   |
| phenol sulfate                                | Amino acid             | 0.19  | 0.2085 |   |
| acetoacetate                                  | Lipid                  | -0.22 | 0.209  |   |
| 2-                                            | Lipid                  | -0.31 | 0.209  | Y |

|                                                      |                        |       |        |   |
|------------------------------------------------------|------------------------|-------|--------|---|
| docosaheptaenoylglycerophosphoethanolamine           |                        |       |        |   |
| 3-carboxy-4-methyl-5-propyl-2-furanpropanoate (CMPF) | Lipid                  | -0.18 | 0.2114 |   |
| 5alpha-androstan-3alpha,17beta-diol disulfate        | Lipid                  | 0.21  | 0.2135 | Y |
| octadecanedioate (C18)                               | Lipid                  | 0.27  | 0.2167 |   |
| hypoxanthine                                         | Nucleotide             | 0.31  | 0.2175 |   |
| beta-hydroxypyruvate                                 | Amino acid             | -0.42 | 0.2188 | Y |
| 4-androsten-3beta,17beta-diol disulfate 2            | Lipid                  | 0.26  | 0.219  |   |
| trizma acetate                                       | Xenobiotics            | -0.09 | 0.2192 | Y |
| mannitol                                             | Carbohydrate           | 0.14  | 0.2193 |   |
| 4-hydroxyphenylacetate                               | Amino acid             | 0.21  | 0.2196 | Y |
| tryptophan betaine                                   | Amino acid             | 0.26  | 0.2228 | Y |
| pantothenate (Vitamin B5)                            | Cofactors and vitamins | 0.39  | 0.223  |   |
| urate                                                | Nucleotide             | 0.56  | 0.2269 |   |
| N-acetylthreonine                                    | Amino acid             | 0.4   | 0.2316 |   |
| 2-hydroxyhippurate (salicylurate)                    | Xenobiotics            | -0.19 | 0.2328 | Y |
| lathosterol                                          | Lipid                  | -0.37 | 0.2333 |   |
| serine                                               | Amino acid             | -0.38 | 0.2376 |   |
| pregnen-diol disulfate                               | Lipid                  | 0.21  | 0.2378 |   |
| glutaryl carnitine (C5)                              | Amino acid             | 0.35  | 0.2424 |   |
| deoxycarnitine                                       | Lipid                  | 0.42  | 0.2427 |   |
| cholate                                              | Lipid                  | 0.18  | 0.2456 | Y |
| threonine                                            | Amino acid             | 0.37  | 0.2463 |   |
| adipate                                              | Lipid                  | 0.25  | 0.2538 | Y |
| caffeine                                             | Xenobiotics            | 0.17  | 0.256  |   |
| pyridoxate                                           | Cofactors and vitamins | 0.17  | 0.2602 |   |
| heptanoate (7:0)                                     | Lipid                  | -0.4  | 0.2605 |   |
| paraxanthine                                         | Xenobiotics            | 0.18  | 0.2697 | Y |
| fructose                                             | Carbohydrate           | -0.24 | 0.283  |   |
| glycerol                                             | Lipid                  | -0.39 | 0.2842 |   |
| pelargonate (9:0)                                    | Lipid                  | -0.37 | 0.2862 |   |
| hydroxyproline                                       | Amino acid             | 0.34  | 0.2865 |   |
| 3-hydroxydecanoate                                   | Lipid                  | 0.32  | 0.2889 | Y |
| 5-dodecenoate (12:1n7)                               | Lipid                  | 0.34  | 0.2941 |   |
| stachydrine                                          | Xenobiotics            | -0.13 | 0.2949 |   |
| 2-hydroxyphenylacetate                               | Xenobiotics            | 0.23  | 0.2954 | Y |
| 4-vinylphenol sulfate                                | Xenobiotics            | -0.16 | 0.3037 |   |
| pregn steroid monosulfate                            | Lipid                  | 0.18  | 0.314  |   |
| docosaheptaenoate (DHA; 22:6n3)                      | Lipid                  | -0.34 | 0.3152 |   |
| cholestanol                                          | Lipid                  | 0.27  | 0.3217 | Y |

|                                              |                        |       |        |   |
|----------------------------------------------|------------------------|-------|--------|---|
| nicotinamide                                 | Cofactors and vitamins | -0.34 | 0.3222 | Y |
| 2-methoxyacetaminophen sulfate               | Xenobiotics            | 0.1   | 0.3326 |   |
| phenylacetate                                | Amino acid             | -0.25 | 0.3385 |   |
| ursodeoxycholate                             | Lipid                  | 0.14  | 0.3388 | Y |
| N-formylmethionine                           | Amino acid             | 0.4   | 0.3456 | Y |
| l-urobilinogen                               | Cofactors and vitamins | 0.13  | 0.3463 | Y |
| iminodiacetate (IDA)                         | Xenobiotics            | -0.23 | 0.3526 |   |
| dihomolinoleate (20:2n6)                     | Lipid                  | -0.3  | 0.3661 |   |
| 1-stearoylglycerol (18:0)                    | Lipid                  | 0.31  | 0.3771 |   |
| beta-alanine                                 | Amino acid             | 0.19  | 0.3983 | Y |
| proline                                      | Amino acid             | 0.31  | 0.4018 |   |
| phenylacetylglutamine                        | Amino acid             | 0.14  | 0.4104 |   |
| salicylate                                   | Xenobiotics            | -0.13 | 0.4148 | Y |
| 3-methylglutaroylcarnitine (C6)              | Amino acid             | 0.15  | 0.4207 | Y |
| 2-oleoyl-GPC (18:1)                          | Lipid                  | -0.17 | 0.4276 | Y |
| theophylline                                 | Xenobiotics            | 0.15  | 0.4295 | Y |
| 3-hydroxyhippurate                           | Xenobiotics            | 0.2   | 0.4331 | Y |
| 3-(cystein-S-yl)acetaminophen                | Xenobiotics            | 0.07  | 0.4352 |   |
| 1,6-anhydroglucose                           | Carbohydrate           | 0.13  | 0.4392 |   |
| pyrophosphate (PPi)                          | Energy                 | 0.3   | 0.4417 | Y |
| 3-methylhistidine                            | Amino acid             | -0.13 | 0.4434 |   |
| arginine                                     | Amino acid             | -0.17 | 0.4487 |   |
| sorbitol                                     | Carbohydrate           | 0.14  | 0.4521 | Y |
| hydantoin-5-propionic acid                   | Amino acid             | 0.2   | 0.4528 | Y |
| epiandrosterone sulfate                      | Lipid                  | -0.12 | 0.4535 |   |
| 5alpha-pregnan-3beta,20alpha-diol disulfate  | Lipid                  | 0.1   | 0.4545 |   |
| trigonelline (N'-methylnicotinate)           | Cofactors and vitamins | -0.15 | 0.4592 | Y |
| 3-indoxyl sulfate                            | Amino acid             | -0.1  | 0.4608 |   |
| thymol sulfate                               | Xenobiotics            | 0.22  | 0.4612 | Y |
| 5alpha-androstan-3beta,17beta-diol disulfate | Lipid                  | 0.15  | 0.4835 |   |
| caprylate (8:0)                              | Lipid                  | 0.24  | 0.4844 |   |
| quininate                                    | Xenobiotics            | 0.11  | 0.4903 |   |
| choline                                      | Lipid                  | 0.34  | 0.4956 |   |
| scyllo-inositol                              | Lipid                  | 0.12  | 0.5034 |   |
| N-acetylglycine                              | Amino acid             | -0.21 | 0.5056 |   |
| 3-methyl-2-oxovalerate                       | Amino acid             | -0.26 | 0.5208 |   |
| vaccenate (18:1n7)                           | Lipid                  | -0.25 | 0.5246 |   |
| alpha-ketoglutarate                          | Energy                 | -0.18 | 0.5273 |   |
| glycerol 2-phosphate                         | Xenobiotics            | -0.19 | 0.5355 | Y |

|                                             |                        |       |        |   |
|---------------------------------------------|------------------------|-------|--------|---|
| piperine                                    | Xenobiotics            | -0.14 | 0.5358 |   |
| chiro-inositol                              | Lipid                  | -0.1  | 0.5568 | Y |
| palmitoleate (16:1n7)                       | Lipid                  | -0.16 | 0.5574 |   |
| N-acetylmethionine                          | Amino acid             | -0.15 | 0.5618 | Y |
| caprate (10:0)                              | Lipid                  | 0.22  | 0.5699 |   |
| stearoylcarnitine (C18)                     | Lipid                  | -0.15 | 0.571  | Y |
| uridine                                     | Nucleotide             | -0.22 | 0.5792 |   |
| succinylcarnitine                           | Energy                 | 0.19  | 0.5913 |   |
| metoprolol acid metabolite                  | Xenobiotics            | 0.04  | 0.6091 | Y |
| pyruvate                                    | Carbohydrate           | -0.18 | 0.6134 |   |
| cys-gly, oxidized                           | Peptide                | -0.1  | 0.6194 | Y |
| AMP                                         | Nucleotide             | -0.17 | 0.6236 |   |
| citrate                                     | Energy                 | 0.18  | 0.6247 |   |
| 4-acetamidophenol                           | Xenobiotics            | 0.05  | 0.6287 |   |
| betaine                                     | Amino acid             | 0.14  | 0.633  |   |
| glycerophosphorylcholine (GPC)              | Lipid                  | -0.14 | 0.642  | Y |
| creatinine                                  | Amino acid             | 0.19  | 0.6486 |   |
| 4-androsten-3beta,17beta-diol disulfate 1   | Lipid                  | 0.08  | 0.6517 |   |
| 10-heptadecenoate (17:1n7)                  | Lipid                  | -0.13 | 0.654  |   |
| gamma-CEHC                                  | Cofactors and vitamins | -0.13 | 0.6692 | Y |
| cis-4-decenoyl carnitine                    | Lipid                  | 0.14  | 0.6756 |   |
| alpha-ketobutyrate                          | Amino acid             | -0.13 | 0.6764 |   |
| 3-hydroxybutyrate (BHBA)                    | Lipid                  | -0.07 | 0.6815 |   |
| palmitoylcarnitine (C16)                    | Lipid                  | -0.09 | 0.6818 |   |
| glycerol 3-phosphate (G3P)                  | Lipid                  | -0.14 | 0.6844 |   |
| laurylcarnitine (C12)                       | Lipid                  | 0.09  | 0.6853 |   |
| 4-hydroxyhippurate                          | Xenobiotics            | 0.08  | 0.696  | Y |
| 1-pentadecanoylglycerophosphocholine (15:0) | Lipid                  | -0.09 | 0.7227 | Y |
| docosadienoate (22:2n6)                     | Lipid                  | 0.11  | 0.7447 | Y |
| 3-phosphoglycerate                          | Carbohydrate           | 0.07  | 0.7465 | Y |
| 2-hydroxyacetaminophen sulfate              | Xenobiotics            | 0.04  | 0.748  |   |
| 2-aminobutyrate                             | Amino acid             | -0.1  | 0.7587 |   |
| p-acetamidophenylglucuronide                | Xenobiotics            | -0.03 | 0.7608 |   |
| myo-inositol                                | Lipid                  | 0.06  | 0.7678 |   |
| eicosenoate (20:1n9 or 1n11)                | Lipid                  | -0.09 | 0.7729 |   |
| margarate (17:0)                            | Lipid                  | -0.11 | 0.774  |   |
| 17-methylstearate                           | Lipid                  | -0.1  | 0.7885 | Y |
| dehydroisoandrosterone sulfate (DHEA-S)     | Lipid                  | -0.04 | 0.7934 |   |
| prolylhydroxyproline                        | Peptide                | -0.07 | 0.7936 |   |

|                              |                        |       |        |   |
|------------------------------|------------------------|-------|--------|---|
| saccharin                    | Xenobiotics            | -0.04 | 0.7954 | Y |
| androsterone sulfate         | Lipid                  | -0.04 | 0.8021 |   |
| isovalerate (C5)             | Lipid                  | -0.1  | 0.8031 |   |
| maltose                      | Carbohydrate           | 0.06  | 0.8062 |   |
| 4-acetaminophen sulfate      | Xenobiotics            | 0.02  | 0.82   |   |
| catechol sulfate             | Xenobiotics            | -0.03 | 0.8387 |   |
| citrulline                   | Amino acid             | 0.06  | 0.8406 |   |
| myristoleate (14:1n5)        | Lipid                  | -0.05 | 0.853  |   |
| 10-nonadecenoate (19:1n9)    | Lipid                  | -0.05 | 0.853  |   |
| andro steroid monosulfate 2  | Lipid                  | 0.03  | 0.8537 | Y |
| heme                         | Cofactors and vitamins | 0.03  | 0.8603 |   |
| alanine                      | Amino acid             | 0.06  | 0.865  |   |
| homostachydrine              | Xenobiotics            | -0.05 | 0.8714 | Y |
| 1,5-anhydroglucitol (1,5-AG) | Carbohydrate           | 0.03  | 0.8769 |   |
| myristate (14:0)             | Lipid                  | -0.07 | 0.8784 |   |
| 2-ethylhexanoic acid         | Xenobiotics            | -0.04 | 0.8882 | Y |
| 4-methyl-2-oxopentanoate     | Amino acid             | -0.05 | 0.8933 |   |
| ADSGEGDFXAEGGGVR             | Peptide                | 0.02  | 0.8967 | Y |
| L-urobilin                   | Cofactors and vitamins | 0.01  | 0.8998 | Y |
| 10-undecenoate (11:1n1)      | Lipid                  | 0.04  | 0.9032 | Y |
| dimethylglycine              | Amino acid             | -0.03 | 0.9167 | Y |
| 2-arachidonoyl-GPC (20:4)    | Lipid                  | -0.02 | 0.921  | Y |
| vancomycin                   | Xenobiotics            | 0.01  | 0.9214 | Y |
| p-cresol sulfate             | Amino acid             | 0.01  | 0.9278 |   |
| oleoylcarnitine (C18)        | Lipid                  | 0.02  | 0.9387 | Y |
| 16-hydroxypalmitate          | Lipid                  | 0.02  | 0.9465 | Y |
| threonate                    | Cofactors and vitamins | -0.02 | 0.9486 |   |
| deoxycholate                 | Lipid                  | 0.01  | 0.9554 |   |
| decanoylcarnitine (C10)      | Lipid                  | 0.01  | 0.9699 |   |
| beta-tocopherol              | Cofactors and vitamins | 0.01  | 0.9768 | Y |
